# Supplementary material for: Inhibin βA is an independent prognostic factor that promotes invasion via Hippo signaling in non-small cell lung cancer
Source: PubMed Central journal article supplement — Mol Med Rep. 2021 Sep 9;24(5):789. doi: 10.3892/mmr.2021.12429 (PMC8441965; doi:10.3892/mmr.2021.12429), 2021-09-09
Supplement: Supplementary_Data.pdf [file Supplementary_Data.pdf]

Table SI. siRNA sequences.

| INHBA siRNA | Sequence (5'-3')                                            |
|-------------|-------------------------------------------------------------|
| siRNA #1    | CCGGCTCTGGCTATCATGCCAACTACTCGAGTAGTTGGCATGATAGCCAGAGTTTTTG  |
| siRNA #2    | CCGGGCTGCACTTCGAGATTTCCAACCTCGAGTTGGAAATCTCGAAGTGCAGCTTTTTG |
| siRNA #3    | CCGGGCTTCTGAACGCGATCAGAACTCGAGTTTCTGATCGCGTTCAGAAGCTTTTT    |

siRNA, small interfering RNA; INHBA, inhibin  $\beta$ A.

Table SII. Primer sequences for reverse transcription-quantitative PCR.

| Gene         | Primer sequence (5'-3')                                    |
|--------------|------------------------------------------------------------|
| <i>CTGF</i>  | F: CAGCATGGACGTTTCGTCTG<br>R: AACCACGGTTTGGTCCTTGG         |
| <i>CYR61</i> | F: CTCGCCTTAGTCGTCACCC<br>R: CGCCGAAGTTGCATTCCAG           |
| <i>INHBA</i> | F: CCTCCCAAAGGATGTACCCAA<br>R: CTCTATCTCCACATACCCGTTCT     |
| <i>NF2</i>   | F: TTGCGAGATGAAGTGGAAAGG<br>R: CAAGAAGTGAAAGGTGACTGGTT     |
| <i>18S</i>   | F: GCAGAATCCACGCCAGTACAAGAT<br>R: TCTTCTTCAGTCGCTCCAGGTCTT |

CTGF, connective tissue growth factor; CYR61, cysteine rich angiogenic inducer 61; INHBA, inhibin  $\beta$ A; F, forward; R, reverse; NRF2, neurofibromin 2.
